# Supplementary material for: Tuning morphology and magnetism of magnetite nanoparticles by calix[8]arene-induced oriented aggregation
Source: Royal Society of Chemistry journal article supplement (doi:10.1039/c6ce01252c), 2016-01-01
Supplement: c6ce01252c1.pdf [file c6ce01252c1.pdf]

Supporting Information

Table of Contents:

|                   |                                                                                  |    |
|-------------------|----------------------------------------------------------------------------------|----|
| <b>Figure S1.</b> | HRTEM images of two different multi-core nanoparticles                           | S1 |
| <b>Figure S2.</b> | TEM image acquired along $\langle 110 \rangle$ zone axis for Oct NPs             | S2 |
| <b>Figure S3.</b> | XRD Diffraction Pattern of MC and Oct NPs                                        | S3 |
| <b>Figure S4.</b> | Increasing the reaction time for CX8: Fe(acac) <sub>3</sub> ratio 1 to two hours | S4 |
| <b>Figure S5.</b> | Intensity and Number size distribution profile of Single-Core NPs                | S5 |
| <b>Figure S6.</b> | Intensity and Number size distribution profile of Multi-Core NPs                 | S6 |
| <b>Figure S7.</b> | Intensity and Number size distribution profile of Octahedral NPs                 | S7 |
| <b>Figure S8.</b> | Magnetization vs applied field curves measured at 5K                             | S8 |

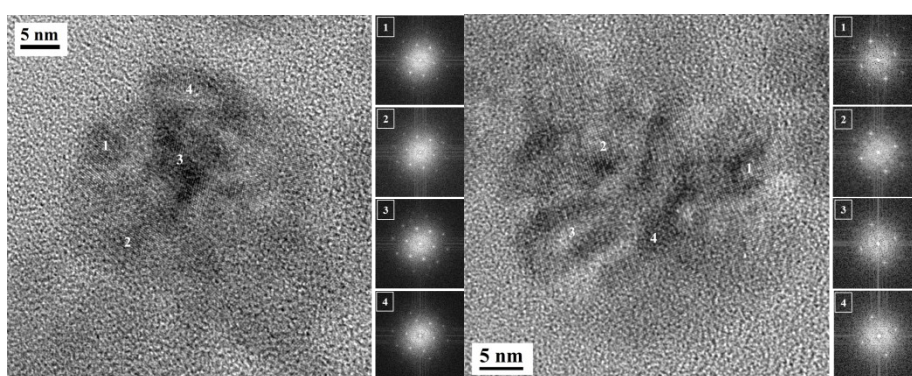

**Figure S1:** HRTEM images of two different multi-core nanoparticles. FFTs taken in different regions of the aggregate (i.e. the cores inside the NPs) show the same crystallographic orientation.

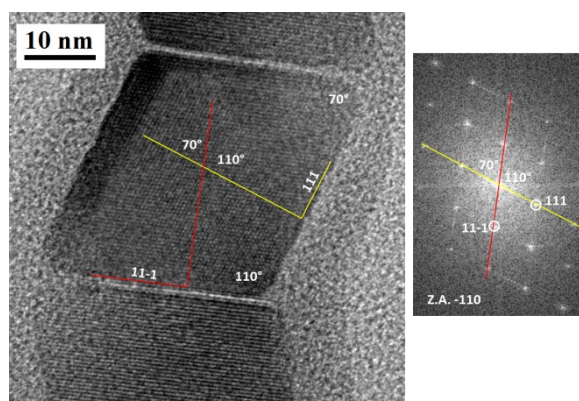

**Figure S2:** TEM image acquired along  $\langle 110 \rangle$  zone axis showing that  $\{111\}$  type facets are exposed in the prepared octahedral magnetite NPs.

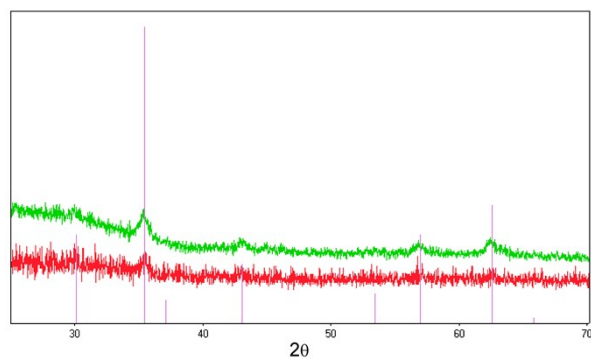

**Figure S3:** X-Ray diffraction patterns of multi-core (green line) and octahedral NPs (red line). The black vertical thin lines highlight the peaks corresponding to the diffraction planes reported in the database for magnetite.

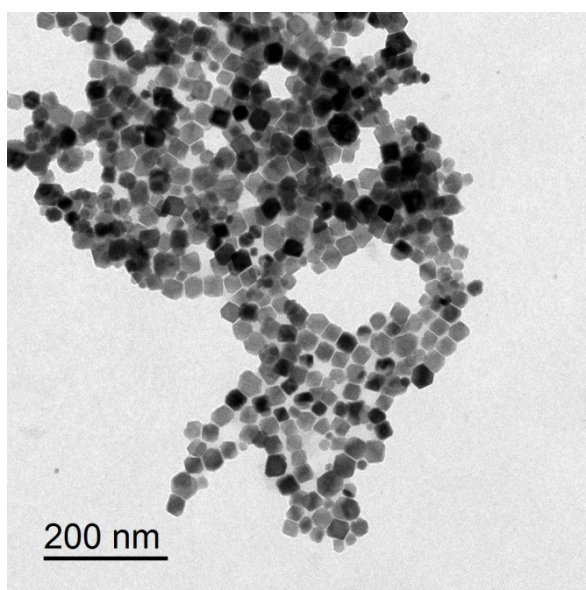

**Figure S4.** Increasing the reaction time for CX8: Fe(acac)<sub>3</sub> ratio 1 to two hours leads to no further modifications in the octahedral morphology of the nanoparticles.

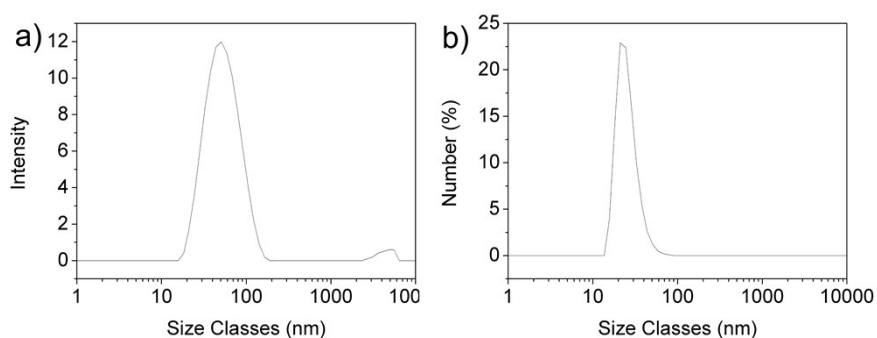

**Figure S5:** Intensity (a) and Number (b) size distribution profile of Single-Core NPs

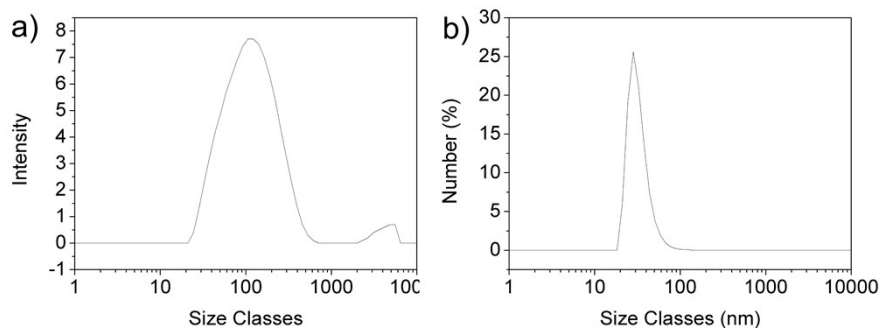

**Figure S6:** Intensity (a) and Number (b) size distribution profile of Multi-Core NPs

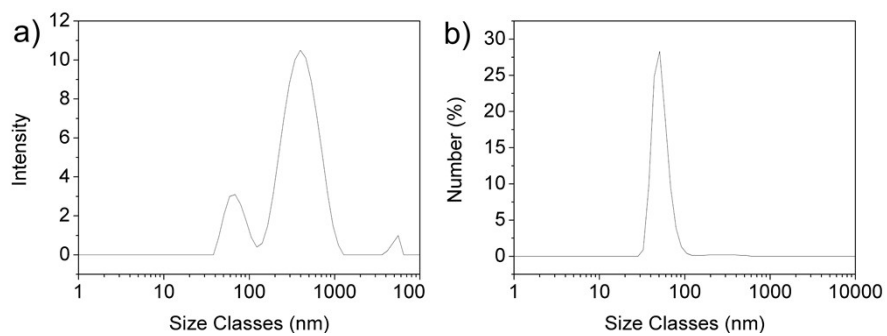

**Figure S7:** Intensity (a) and Number (b) size distribution profile of Octahedral NPs

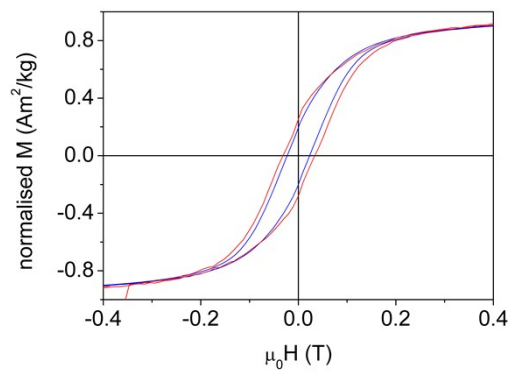

**Figure S8:** Magnetization vs applied field curves, measured and 5K for single-core (black line), multi-core (blue line) and octahedral NPs (red line)
